# Supplementary material for: Influence of External Magnetic Field on the Microwave Absorption Properties of Carbonyl Iron and Polychloroprene Composites Film
Source: Preprints.org preprint supplement (doi:10.20944/preprints201609.0112.v1), 2016-09-28
Supplement: Supplementary file 1 [file supplementary]

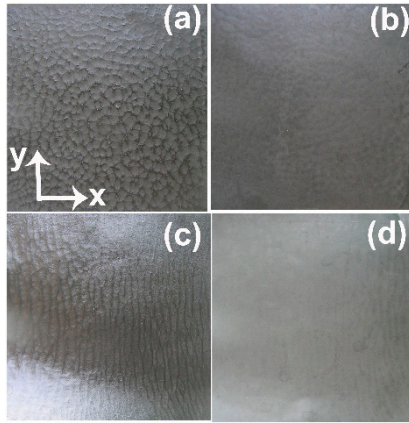

Figure s1 The photographs of film Fb and Fc (a) front surface exposed to air of Fb; (b) reverse surface contacted glass box bottom of Fb (c) front surface exposed to air of Fc (d) reverse surface contacted glass box bottom of Fc

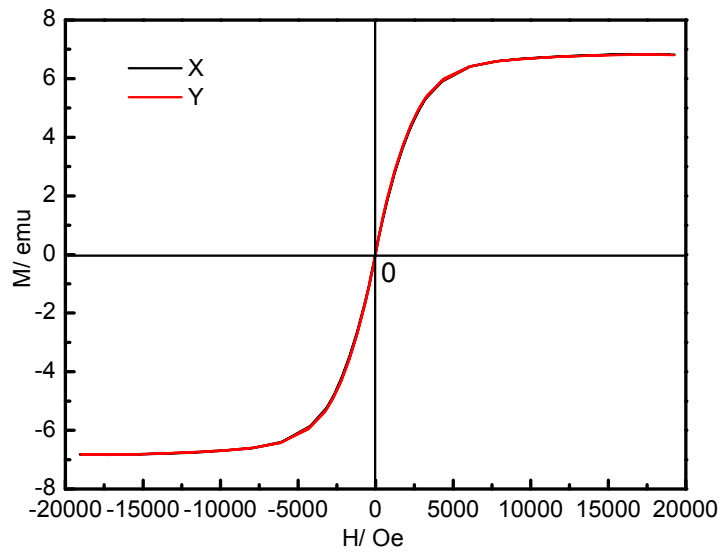

Figure s2 The different direction VSM of Fb at room temperature

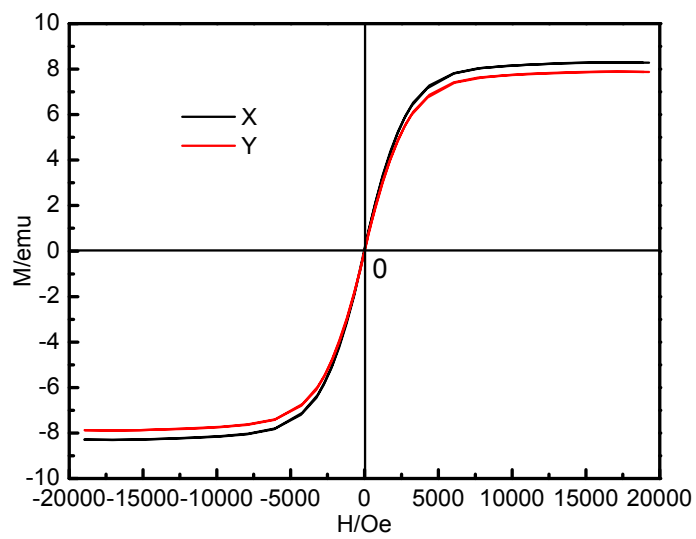

Figure s3 The different direction VSM of Fc at room temperature
